# Supplementary material
Source: Royal Society of Chemistry journal article supplement (doi:10.1039/d6ta00004e)
Supplement: d6ta00004e1.pdf [file d6ta00004e1.pdf]

## Supporting Information

**Kajal Panchal, Kaushalya Bhakar, Naresh Rajpurohit, and Dinesh Kumar\***

School of Chemical Sciences, Central University of Gujarat, Kundhela, Vadodara 391107,  
Gujarat, India

\*Corresponding author's email: dinesh.kumar@cug.ac.in

| <b>S.No.</b> | <b>Description</b>                               | <b>Page number</b> |
|--------------|--------------------------------------------------|--------------------|
| <b>1.</b>    | Experimental section                             | S1                 |
| <b>1.1</b>   | Material characterization                        | S1                 |
| <b>1.2</b>   | Electrochemical analysis in<br>3-electrode setup | S2                 |
| <b>1.3</b>   | Hybrid supercapacitor<br>device fabrication      | S2                 |
| <b>1.4</b>   | Electrochemical calculation                      | S2                 |
| <b>S1</b>    | CV plot of CZL, CFPBA,<br>CFS, and CFS@NV-LDH    | S3                 |
| <b>S2</b>    | GCD plot of CFPBA, CFS,<br>and NV-LDH            | S4                 |
| <b>S3</b>    | CV and GCD of activated<br>carbon                | S5                 |
| <b>S4</b>    | Combined CV of CFS@NV-<br>LDH and AC             | S6                 |
| <b>S5</b>    | XPS spectra of CFS and NV-<br>LDH                | S7                 |
| <b>S6</b>    | BET and BJH graph of CFS<br>and NV-LDH           | S7                 |
| <b>S7</b>    | Charge storage mechanism<br>of CFS               | S8                 |
| <b>S8</b>    | Charge storage mechanism<br>of NV-LDH            | S9                 |
| <b>S9</b>    | Post stability XRD plot                          | S9                 |
| <b>S10</b>   | Post stability SEM images                        | S10                |
| <b>S11</b>   | EIS circuit diagram                              | S10                |
| <b>S12</b>   | EDX mapping of CFS@NV-<br>LDH                    | S11                |

## Supporting Information

|     |                                                |     |
|-----|------------------------------------------------|-----|
| S13 | EIS of CFS@NV-LDH at different applied voltage | S12 |
|-----|------------------------------------------------|-----|

### 1. Experimental section

#### 1.1 Material characterization

All chemicals and solvents were purchased from a commercial source and were free of further impurities. To evaluate the characteristics of as-synthesized materials, they are subjected to various analyses. Cu K $\alpha$  (0.154nm) monochromatic radiation was employed with a Bruker AXS D8 focus for powder X-ray diffraction (P-XRD) to determine the crystallographic features. Scanning electron microscopy was used to analyse the structural configuration of the synthesized materials. The Brunauer-Emmett-Teller (BET) surface area of the composite and Barrett-Joyner-Halenda pore size distribution were analyzed by Quantachrome instruments. The oxidation state and binding energy of the developed material were studied in an N<sub>2</sub> atmosphere using a Thermo Fisher Nexsa XPS instrument. All electrochemical analyses were performed on a CHI920D workstation using a 3-electrode setup.

#### 1.2 Electrochemical analysis in a 3-electrode system

The as-prepared binder-free, free-standing CFS@NV-LDH was carefully cut into 1 cm<sup>2</sup> pieces (~3 mg mass loading) and used as the working electrode, Ag/AgCl as the reference electrode, and a Pt wire as the counter electrode in a 3-electrode assembly. The mass loading was determined by measuring the weight difference of the nickel foam before and after the growth of the material using an analytical balance. The electrochemical analysis was performed using cyclic voltammetry (CV), galvanostatic charge-discharge (GCD), and electrochemical impedance spectroscopy (EIS) in a 2M KOH electrolyte solution.

#### 1.3 Hybrid supercapacitor device fabrication

The free-standing CFS@NV-LDH electrode was used as the cathode, and for the anode, activated carbon, conducting carbon black, and PVDF binder were dispersed in NMP at an 8:1:1 ratio. Then, the slurry was drop-cast on a cleaned current collector. For assembly, the electrodes and cellulose paper were soaked in a 6 M KOH electrolyte and then assembled in a Swagelok cell.

#### 1.4 Electrochemical calculations

## Supporting Information

The Specific capacitance ( $C_s$ ), Energy Density ( $E_d$ ), and Power Density ( $P_d$ ) were calculated using the following equations (1), (2), and (3):

$$C_s(F\ g^{-1}) = \frac{I * \Delta t}{m * \Delta V} \quad (S1)$$

Here, where  $C_s$  represents the specific capacitance,  $I$  refer to the applied current,  $m$  represents the mass loading of active material,  $\Delta V$  is the operating potential window, and  $\Delta t$  is the discharge time (sec.).

$$E_d(Wh\ kg^{-1}) = \frac{C_s V^2}{7.2} \quad (S2)$$

$$P_d(W\ kg^{-1}) = \frac{E_d * 3600}{\Delta t} \quad (S3)$$

## Supporting Information

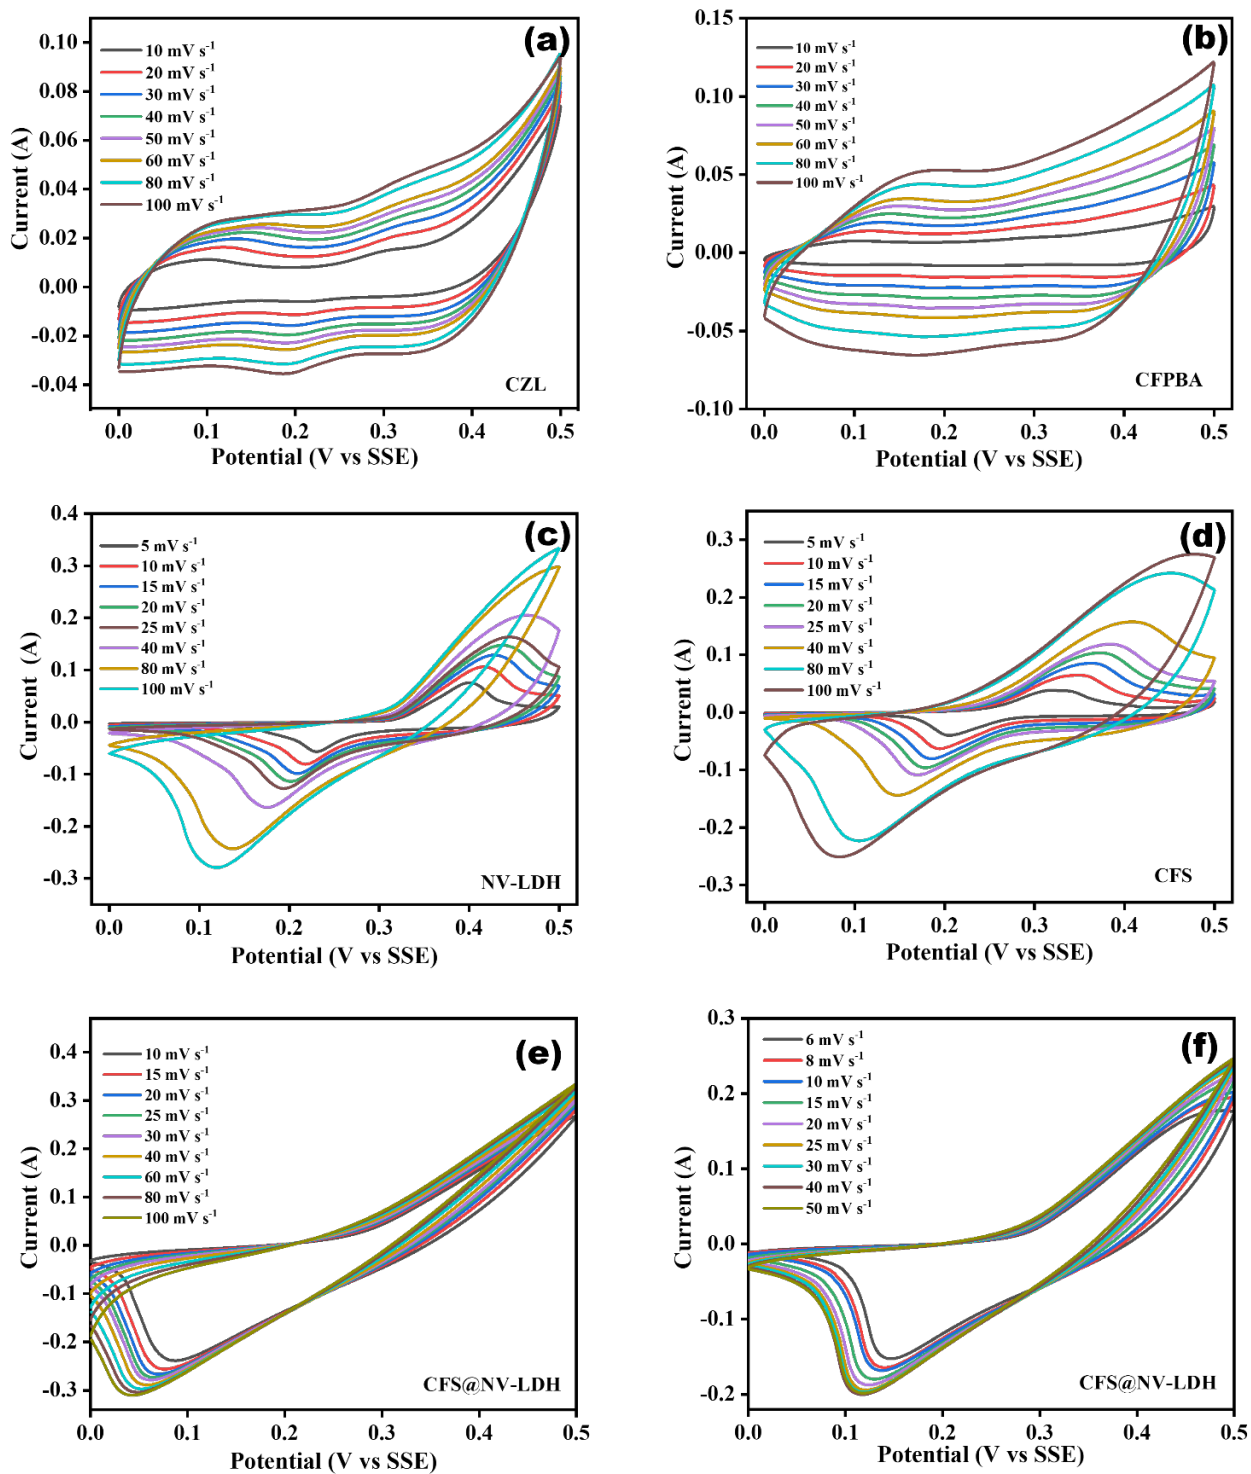

**Fig. S1.** CV plot of (a) CZL, (b) CFPBA, (c) NV-LDH, (d) CFS, (e & f) CFS@NV-LDH at variable scan rate

## Supporting Information

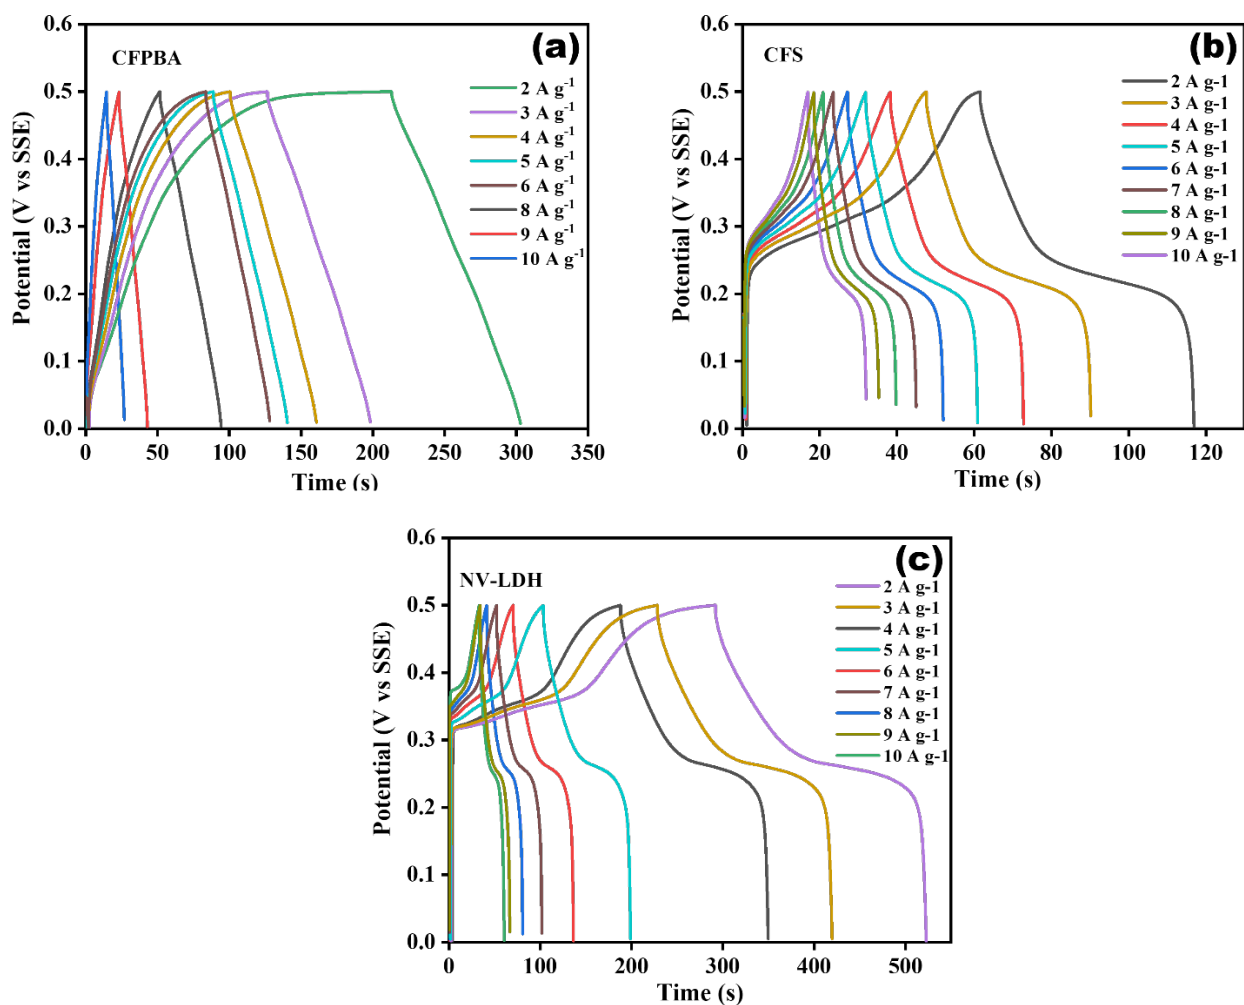

**Fig. S2** GCD plot of (a) CFPBA, (b) CFS, (c) NV-LDH

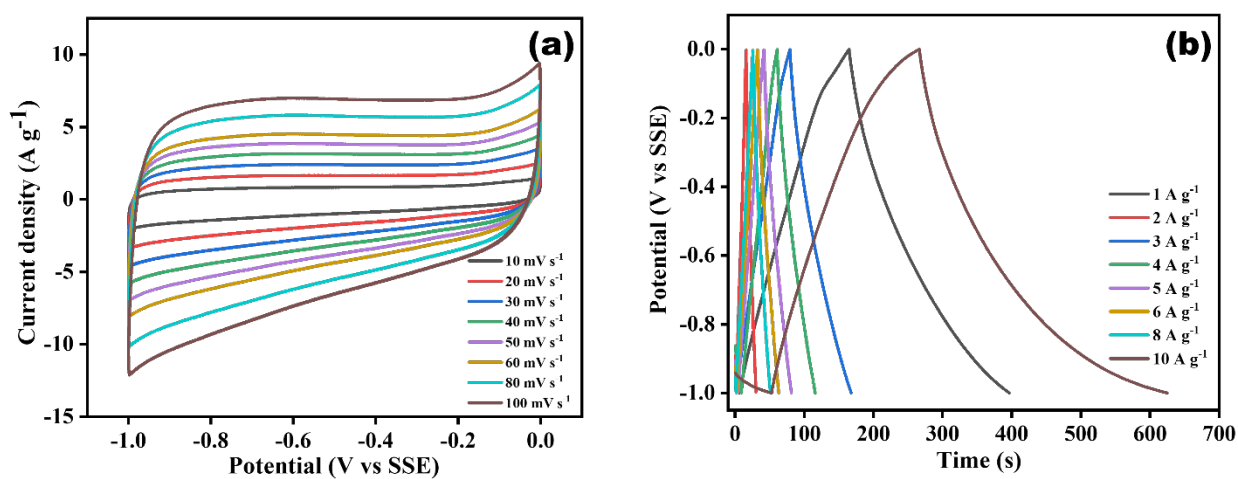

**Fig. S3.** (a) CV of activated carbon (AC) at variable scan rate, (b) GCD of AC at variable current density

## Supporting Information

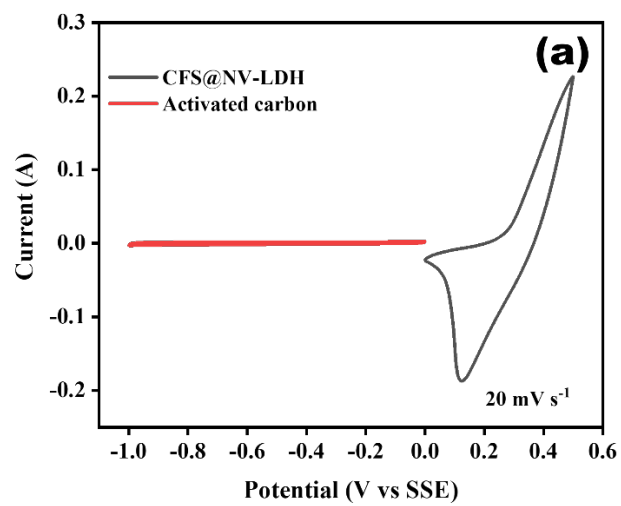

**Fig. S4** Combined CV of CFS@NV-LDH and AC

## Supporting Information

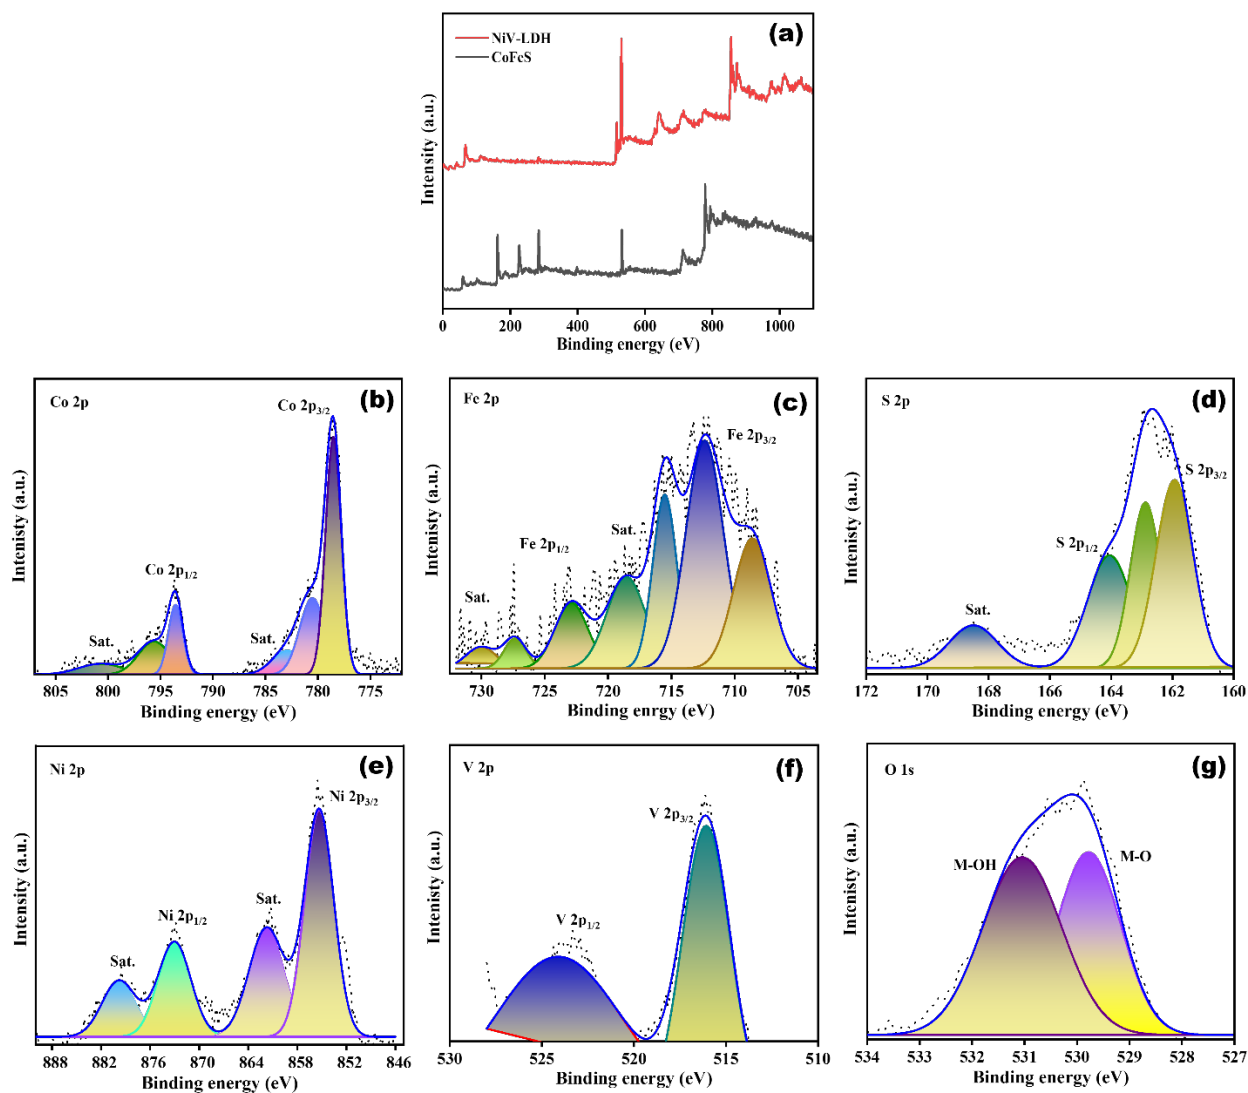

**Fig. S5** (a) comparative survey spectra, (b) XPS spectrum of CFS Co 2p, (c) Fe 2p, (d) S 2p, (e) XPS spectrum of NV-LDH Ni 2p, (f) V 2p, (g) O 1s

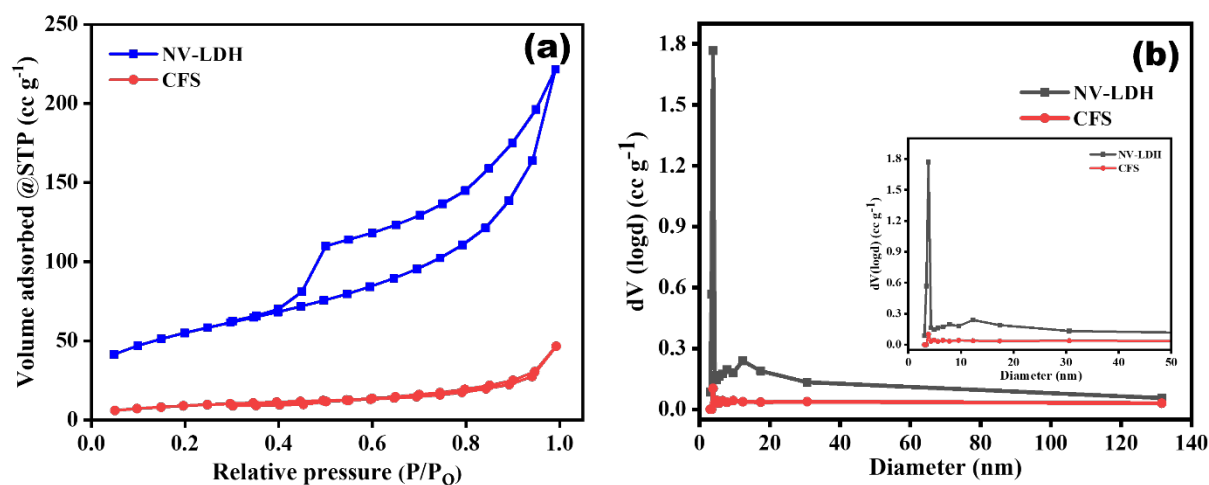

**Fig. S6** (a) BET graph of CFS, and NV-LDH, (b) BJH graph of CFS and NV-LDH

## Supporting Information

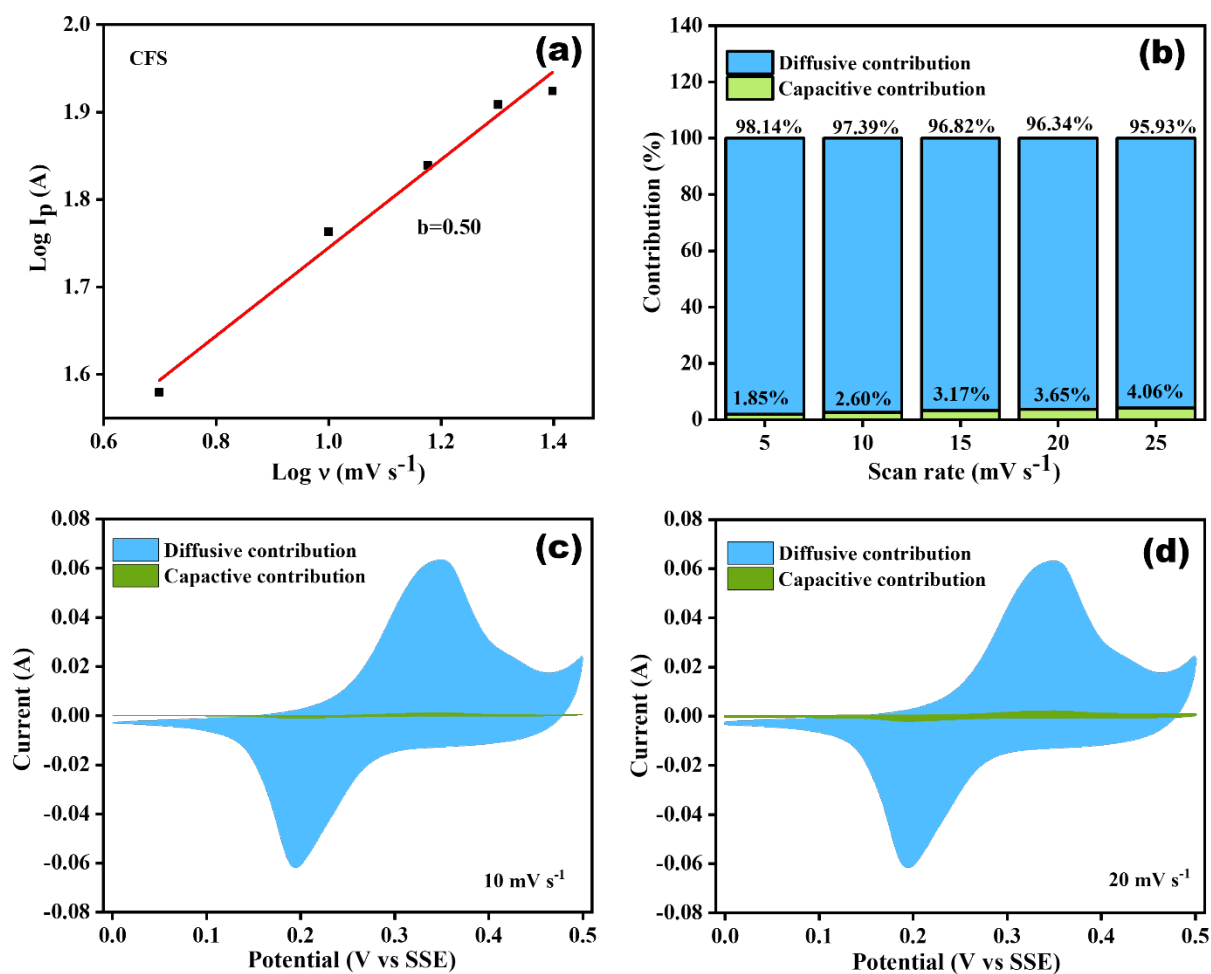

**Fig. S7** Charge storage mechanism of CFS (a)  $\text{Log } I_p$  vs  $\text{Log } v$  plot, (b) diffusive and capacitive contribution at variable scan rate, (c) & (d) diffusive and capacitive contribution at 10 and 20  $\text{mV s}^{-1}$  scan rate

## Supporting Information

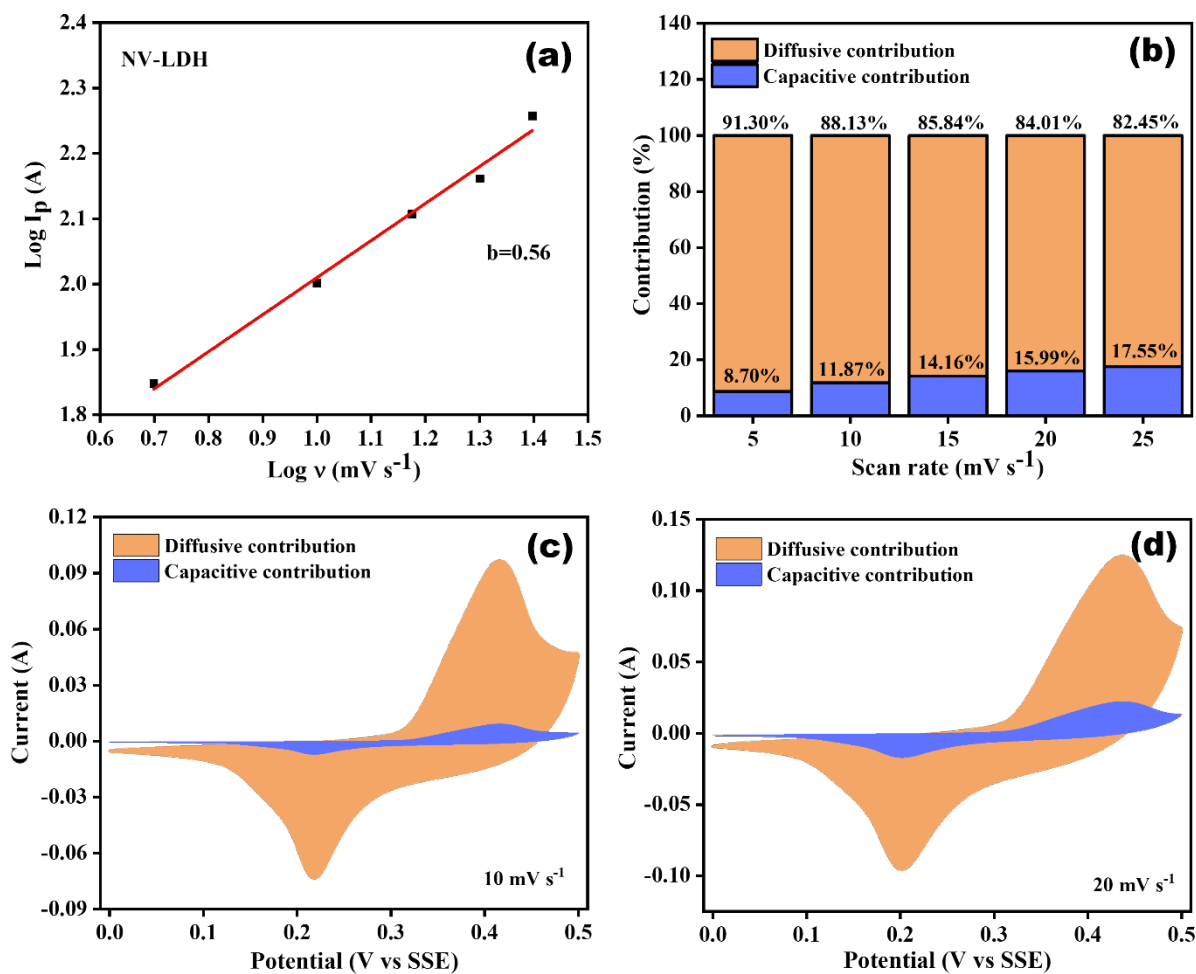

**Fig. S8** Charge storage mechanism of NV-LDH (a) Log  $I_p$  vs Log  $v$  plot, (b) diffusive and capacitive contribution at variable scan rate, (c) & (d) diffusive and capacitive contribution at 10 and 20  $\text{mV s}^{-1}$  scan rate

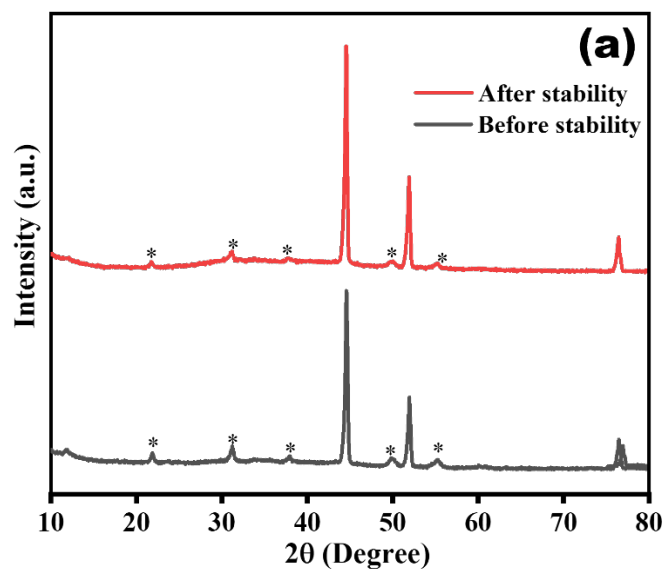

**Fig. S9 (a)** Post-stability XRD plot

## Supporting Information

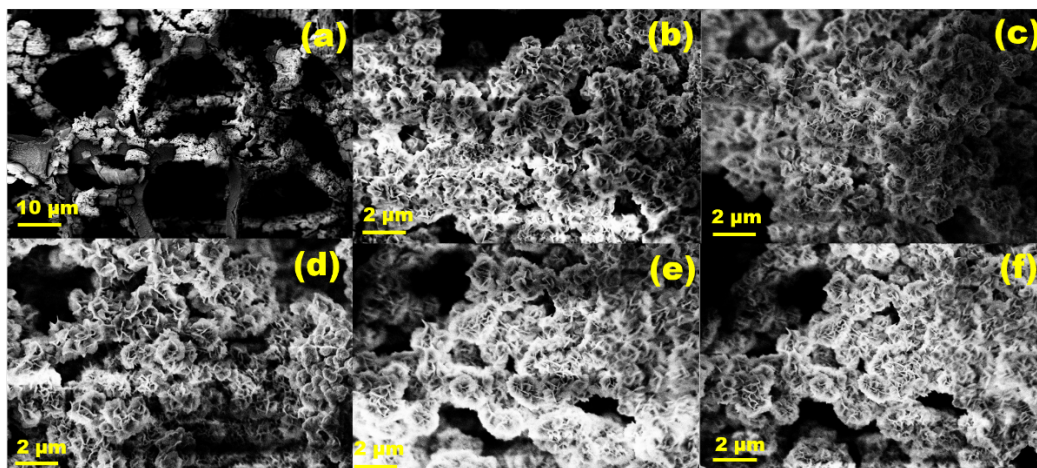

Fig. S10 (a-f) After stability SEM images of CFS@NV-LDH at different magnifications

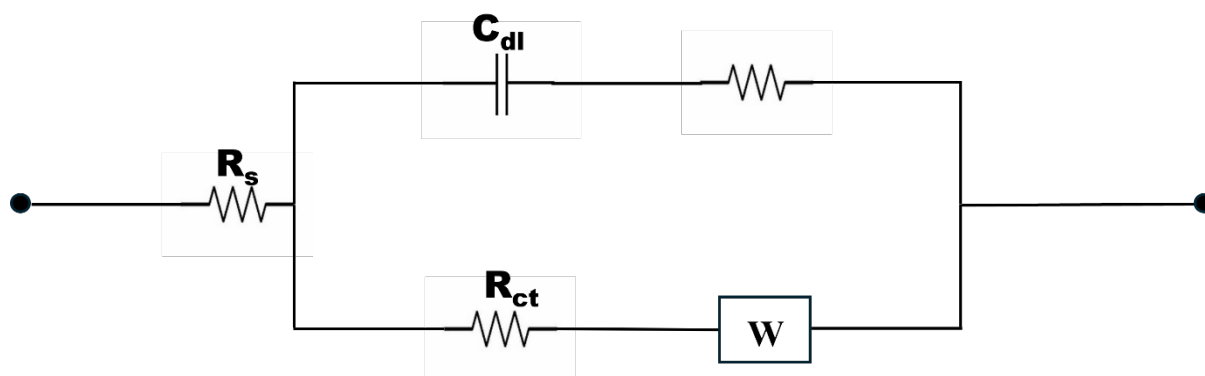

Fig. S11 EIS circuit diagram

## Supporting Information

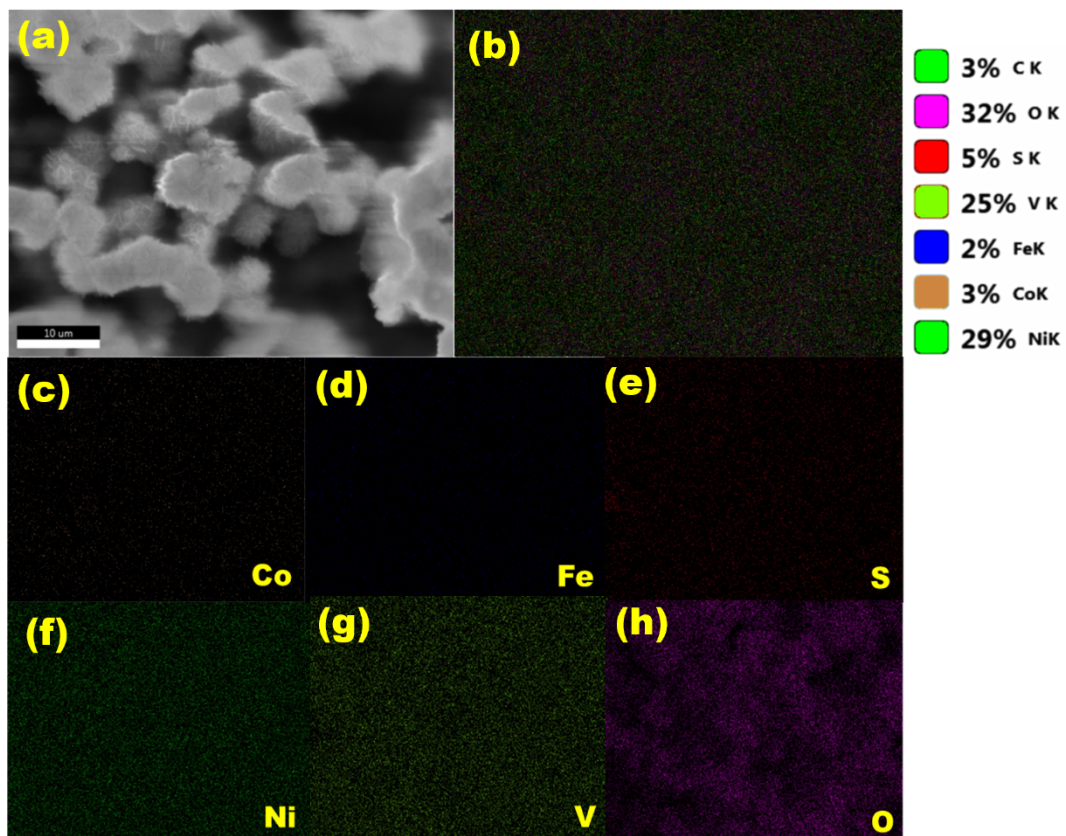

**Fig.S12** EDX mapping of CFS@NV-LDH heterostructure

## Supporting Information

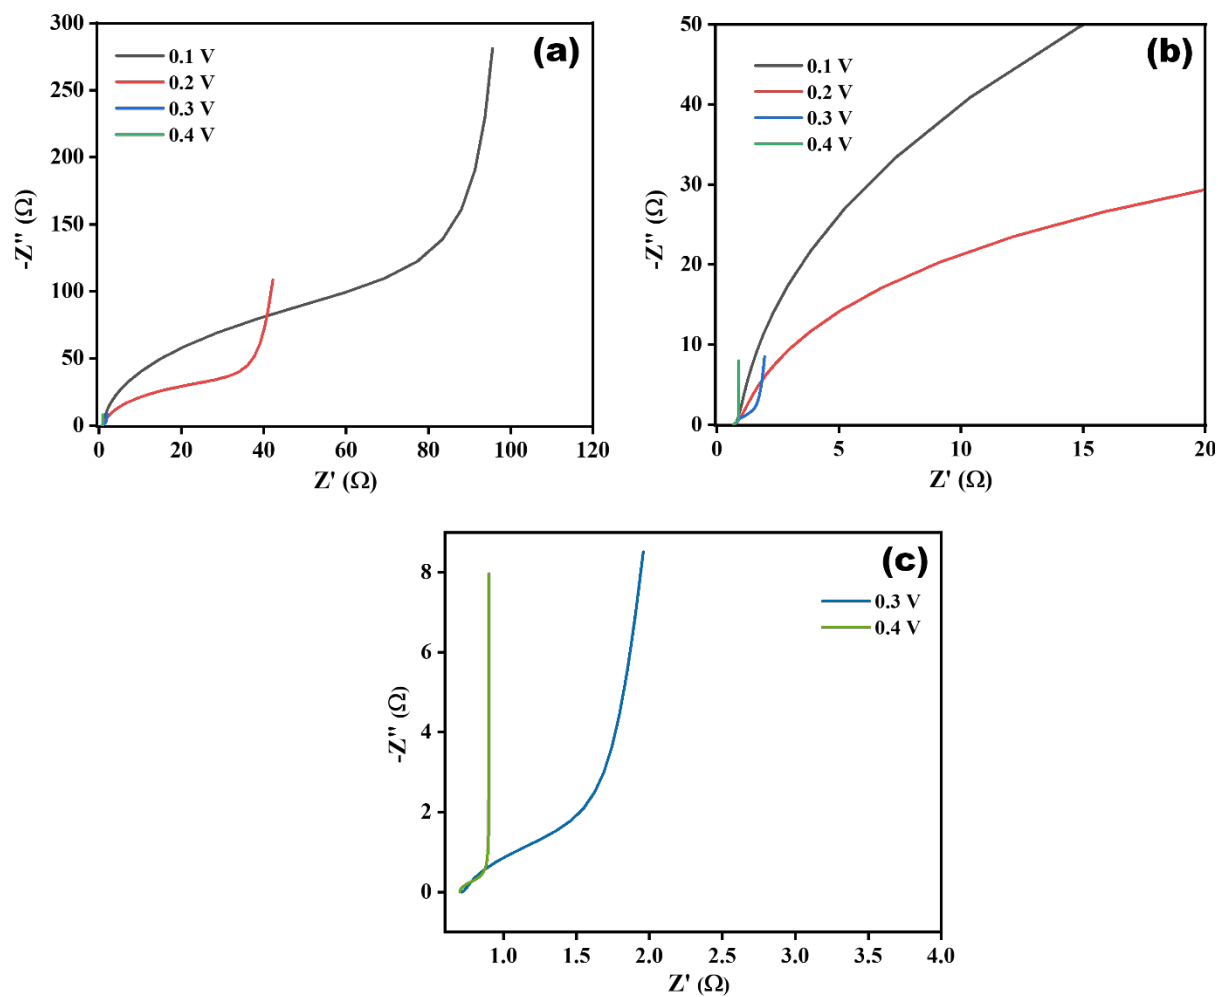

**Fig. S13** EIS analysis of CFS@NV-LDH at different applied voltage (a), (b), &(c)
